# Supplementary material for: New Predictive Models for Falls in Acute Care Setting Classified Using An Activities of Daily Living Scale in Japan: A Retrospective Cohort Study
Source: Research Square preprint supplement (doi:10.21203/rs.3.rs-786305/v1), 2021-08-12
Supplement: Supplementary file 1 [file 529005532cca5bc949110f43.docx]

**Supplementary File**

**Supplementary Table 1.** The classification of fall incident or accident levels by the Medical Safety Management Council of National University Hospitals in Japan (2002)

| **Level** | **Outcome** | **Severity** | **Contents** |
| --- | --- | --- | --- |
| Level 0 | ー | ー | Errors and drug/medical device malfunctions were observed but not implemented on the patient |
| Level 1 | None | ー | No real harm to the patient (Can't rule out the possibility that it had some impact) |
| Level 2 | Transient | Mild | No procedure or treatment (The need for increased observation, mild changes in vital signs, and tests to confirm safety arose) |
| Level 3a | Transient | Moderate | It required a simple procedure or treatment (Disinfecting, Poultice, suturing the skin, administering painkillers, etc.) |
| Level 3b | Transient | Severe | It required intense treatment and procedures (Severe changes in vital signs, placement on ventilator, surgery, extended hospital stay, Hospitalization of outpatients, fracture, etc.) |
| Level 4a | Permanent | Mild to moderate | Permanent disability or sequelae, but not accompanied by significant functional impairment or cosmetic problems |
| Level 4b | Permanent | Moderate to severe | Permanent disability or residual disability, but with significant functional impairment or cosmetic problems |
| Level 5 | Death |  | Death (Excluding those caused by the natural course of the primary disease) |

**Supplementary Table 2.** Frequency of falls for all incident levels in an entire population (N=22,988)

| **Level** | **Number of patents with fall (653 cases)** |
| --- | --- |
| Level 0 | 1 |
| Level 1 | 252 |
| Level 2 | 346 |
| Level 3a | 44 |
| Level 3b | 9 |
| Level 4a | 1 |
| Level 4b | 0 |
| Level 5 | 0 |

**Supplementary Table 3.** Frequency of falls at incident level 2 or higher by bedriddenness in an entire population (N=22,988)

| **Bedriddenness rank**  **(fall cases)** | **Level** | **Number of patients with fall** |
| --- | --- | --- |
| Rank J (N=120) | Level 2 | 98 |
| Level 3a | 17 |
| Level 3b | 5 |
| Rank A (N=115) | Level 2 | 101 |
| Level 3a | 12 |
| Level 3b | 1 |
| Level 4 a | 1 |
| Rank B (N=62) | Level 2 | 55 |
| Level 3a | 7 |
| Rank C (N=103) | Level 2 | 92 |
| Level 3a | 8 |
| Level 3b | 3 |

**Supplementary Table 4.** Spearman’s correlation coefficient between the covariates

|  | Inpatient ward | Age | Sex | Date of admission | Emergency admission | Ambulance transport | Height | Weight | BMI | Eating | Transferring | Dressing | Moving and using the toilet | Bathing | Walking on level ground | Stair climbing | Changing clothes | Defecation management | Urination management | Presence of cognitive function scores | Disturbance of consciousness | Dementia | Parkinson's disease | Stroke | Visual impairment | Good sleep condition | Use of sleeping pills | Use of care insurance | Bedriddenness rank | Medication management status | History of falls within 1 year | Inability to stand without holding | Impaired judgment and comprehension | Toileting assistance |
| --- | --- | --- | --- | --- | --- | --- | --- | --- | --- | --- | --- | --- | --- | --- | --- | --- | --- | --- | --- | --- | --- | --- | --- | --- | --- | --- | --- | --- | --- | --- | --- | --- | --- | --- |
| Age | 0.001 | 1 |  |  |  |  |  |  |  |  |  |  |  |  |  |  |  |  |  |  |  |  |  |  |  |  |  |  |  |  |  |  |  |  |
| Sex | 0.008 | 0.086 | 1 |  |  |  |  |  |  |  |  |  |  |  |  |  |  |  |  |  |  |  |  |  |  |  |  |  |  |  |  |  |  |  |
| Date of admission | 0.079 | 0.158 | -0.005 | 1 |  |  |  |  |  |  |  |  |  |  |  |  |  |  |  |  |  |  |  |  |  |  |  |  |  |  |  |  |  |  |
| Emergency admission | -0.071 | 0.141 | -0.022 | 0.278 | 1 |  |  |  |  |  |  |  |  |  |  |  |  |  |  |  |  |  |  |  |  |  |  |  |  |  |  |  |  |  |
| Ambulance transport | 0.099 | 0.190 | 0.008 | 0.188 | **0.535** | 1 |  |  |  |  |  |  |  |  |  |  |  |  |  |  |  |  |  |  |  |  |  |  |  |  |  |  |  |  |
| Height | 0.005 | **-0.320** | **0.679** | -0.087 | -0.081 | -0.068 | 1 |  |  |  |  |  |  |  |  |  |  |  |  |  |  |  |  |  |  |  |  |  |  |  |  |  |  |  |
| Weight | 0.026 | **-0.306** | 0.403 | -0.116 | -0.155 | -0.120 | **0.594** | 1 |  |  |  |  |  |  |  |  |  |  |  |  |  |  |  |  |  |  |  |  |  |  |  |  |  |  |
| BMI | 0.032 | -0.151 | 0.063 | -0.087 | -0.139 | -0.105 | 0.083 | **0.826** | 1 |  |  |  |  |  |  |  |  |  |  |  |  |  |  |  |  |  |  |  |  |  |  |  |  |  |
| Eating | 0.031 | **0.305** | -0.010 | 0.283 | **0.516** | **0.568** | -0.147 | -0.211 | -0.159 | 1 |  |  |  |  |  |  |  |  |  |  |  |  |  |  |  |  |  |  |  |  |  |  |  |  |
| Transferring | 0.009 | **0.322** | -0.005 | 0.299 | **0.569** | **0.543** | -0.153 | -0.210 | -0.152 | **0.837** | 1 |  |  |  |  |  |  |  |  |  |  |  |  |  |  |  |  |  |  |  |  |  |  |  |
| Dressing | 0.041 | **0.303** | -0.010 | 0.283 | **0.517** | **0.575** | -0.146 | -0.205 | -0.153 | **0.900** | **0.835** | 1 |  |  |  |  |  |  |  |  |  |  |  |  |  |  |  |  |  |  |  |  |  |  |
| Moving and using the toilet | 0.022 | **0.321** | -0.007 | 0.298 | **0.545** | **0.563** | -0.151 | -0.208 | -0.152 | **0.883** | **0.897** | **0.890** | 1 |  |  |  |  |  |  |  |  |  |  |  |  |  |  |  |  |  |  |  |  |  |
| Bathing | 0.016 | **0.323** | -0.008 | 0.293 | **0.542** | **0.539** | -0.155 | -0.216 | -0.157 | **0.847** | **0.889** | **0.853** | **0.906** | 1 |  |  |  |  |  |  |  |  |  |  |  |  |  |  |  |  |  |  |  |  |
| Walking on level ground | 0.016 | **0.322** | -0.009 | **0.303** | **0.542** | **0.545** | -0.155 | -0.210 | -0.152 | **0.851** | **0.902** | **0.851** | **0.909** | **0.907** | 1 |  |  |  |  |  |  |  |  |  |  |  |  |  |  |  |  |  |  |  |
| Stair climbing | -0.002 | **0.331** | -0.008 | 0.293 | **0.526** | **0.505** | -0.159 | -0.213 | -0.152 | **0.795** | **0.871** | **0.795** | **0.861** | **0.909** | **0.911** | 1 |  |  |  |  |  |  |  |  |  |  |  |  |  |  |  |  |  |  |
| Changing clothes | 0.028 | **0.314** | -0.005 | 0.288 | **0.540** | **0.563** | -0.146 | -0.205 | -0.152 | **0.883** | **0.887** | **0.888** | **0.924** | **0.909** | **0.904** | **0.870** | 1 |  |  |  |  |  |  |  |  |  |  |  |  |  |  |  |  |  |
| Defecation management | 0.044 | 0.298 | -0.007 | 0.274 | **0.504** | **0.580** | -0.136 | -0.192 | -0.144 | **0.860** | **0.784** | **0.862** | **0.849** | **0.797** | **0.810** | **0.748** | **0.840** | 1 |  |  |  |  |  |  |  |  |  |  |  |  |  |  |  |  |
| Urination management | 0.042 | **0.301** | -0.008 | 0.275 | **0.503** | **0.579** | -0.138 | -0.194 | -0.145 | **0.863** | **0.787** | **0.863** | **0.850** | **0.799** | **0.810** | **0.750** | **0.842** | **0.981** | 1 |  |  |  |  |  |  |  |  |  |  |  |  |  |  |  |
| Presence of cognitive function scores | -0.044 | 0.091 | -0.119 | 0.095 | 0.207 | 0.182 | -0.131 | -0.142 | -0.094 | 0.270 | 0.243 | 0.267 | 0.260 | 0.250 | 0.251 | 0.236 | 0.263 | 0.282 | 0.287 | 1 |  |  |  |  |  |  |  |  |  |  |  |  |  |  |
| Disturbance of consciousness | 0.061 | 0.233 | -0.017 | 0.175 | **0.332** | **0.439** | -0.117 | -0.167 | -0.130 | **0.526** | **0.472** | **0.522** | **0.502** | **0.472** | **0.483** | **0.447** | **0.500** | **0.552** | **0.553** | **0.381** | 1 |  |  |  |  |  |  |  |  |  |  |  |  |  |
| Dementia | -0.014 | 0.011 | 0.008 | -0.011 | -0.010 | -0.005 | 0.000 | -0.001 | 0.000 | 0.001 | 0.001 | 0.006 | 0.001 | 0.008 | 0.001 | 0.005 | 0.003 | -0.001 | -0.002 | 0.012 | 0.005 | 1 |  |  |  |  |  |  |  |  |  |  |  |  |
| Parkinson's disease | -0.013 | 0.040 | -0.002 | 0.028 | 0.035 | 0.035 | -0.033 | -0.023 | -0.008 | 0.079 | 0.085 | 0.073 | 0.081 | 0.080 | 0.080 | 0.081 | 0.079 | 0.077 | 0.078 | 0.059 | 0.073 | -0.008 | 1 |  |  |  |  |  |  |  |  |  |  |  |
| Stroke | -0.040 | 0.167 | 0.051 | 0.091 | 0.145 | 0.157 | -0.034 | -0.031 | -0.013 | 0.210 | 0.209 | 0.206 | 0.211 | 0.204 | 0.211 | 0.203 | 0.211 | 0.201 | 0.203 | 0.079 | 0.202 | 0.005 | 0.066 | 1 |  |  |  |  |  |  |  |  |  |  |
| Visual impairment | -0.003 | 0.131 | 0.016 | 0.002 | 0.005 | -0.018 | -0.050 | -0.036 | -0.010 | 0.045 | 0.062 | 0.043 | 0.057 | 0.057 | 0.059 | 0.072 | 0.056 | 0.035 | 0.035 | -0.009 | 0.009 | -0.004 | -0.001 | 0.112 | 1 |  |  |  |  |  |  |  |  |  |
| Good sleep condition | -0.114 | 0.067 | -0.037 | 0.054 | **0.419** | **0.383** | -0.057 | -0.052 | -0.028 | **0.300** | **0.302** | **0.301** | **0.303** | 0.296 | **0.300** | 0.284 | **0.302** | **0.306** | **0.307** | 0.170 | 0.228 | -0.008 | 0.014 | 0.096 | -0.060 | 1 |  |  |  |  |  |  |  |  |
| Use of sleeping pills | -0.107 | 0.082 | -0.041 | 0.038 | **0.398** | **0.378** | -0.064 | -0.056 | -0.029 | 0.295 | 0.295 | 0.293 | 0.297 | 0.288 | 0.292 | 0.275 | 0.296 | **0.300** | **0.300** | 0.168 | 0.229 | -0.007 | 0.012 | 0.105 | -0.049 | **0.689** | 1 |  |  |  |  |  |  |  |
| Use of care insurance | 0.064 | -0.130 | -0.025 | -0.108 | -0.150 | -0.109 | 0.034 | 0.099 | 0.099 | -0.188 | -0.201 | -0.188 | -0.193 | -0.198 | -0.202 | -0.205 | -0.198 | -0.178 | -0.178 | -0.104 | -0.137 | -0.003 | -0.047 | -0.108 | -0.080 | -0.028 | -0.030 | 1 |  |  |  |  |  |  |
| Bedriddenness rank | 0.054 | 0.257 | -0.019 | 0.255 | **0.546** | **0.512** | -0.134 | -0.175 | -0.125 | **0.616** | **0.639** | **0.619** | **0.639** | **0.636** | **0.639** | **0.624** | **0.637** | **0.600** | **0.600** | 0.202 | 0.404 | -0.005 | 0.070 | 0.179 | 0.025 | **0.330** | **0.313** | -0.147 | 1 |  |  |  |  |  |
| Medication management status | -0.053 | -0.001 | 0.020 | 0.047 | **0.367** | 0.277 | 0.015 | -0.019 | -0.036 | 0.252 | 0.258 | 0.257 | 0.260 | 0.255 | 0.253 | 0.245 | 0.256 | 0.259 | 0.259 | 0.138 | 0.191 | -0.011 | 0.021 | 0.073 | -0.007 | 0.299 | 0.287 | -0.062 | 0.283 | 1 |  |  |  |  |
| History of falls within 1 year | 0.094 | 0.120 | -0.036 | 0.102 | 0.204 | 0.229 | -0.077 | -0.073 | -0.038 | 0.235 | 0.238 | 0.236 | 0.239 | 0.238 | 0.239 | 0.232 | 0.242 | 0.235 | 0.235 | 0.087 | 0.191 | -0.018 | 0.045 | 0.075 | 0.012 | 0.138 | 0.136 | -0.045 | 0.254 | 0.109 | 1 |  |  |  |
| Inability to stand without holding | 0.034 | 0.291 | -0.024 | 0.218 | **0.420** | **0.346** | -0.157 | -0.175 | -0.102 | **0.434** | **0.491** | **0.434** | **0.465** | **0.475** | **0.478** | **0.485** | **0.465** | **0.407** | **0.409** | 0.118 | 0.274 | -0.004 | 0.059 | 0.150 | 0.065 | 0.221 | 0.212 | -0.133 | **0.473** | 0.186 | **0.534** | 1 |  |  |
| Impaired judgment and comprehension | 0.056 | 0.164 | -0.028 | 0.108 | **0.261** | 0.296 | -0.100 | -0.117 | -0.075 | **0.337** | **0.317** | **0.336** | **0.331** | **0.319** | **0.321** | **0.302** | **0.332** | **0.349** | **0.349** | 0.206 | **0.388** | -0.019 | 0.057 | 0.117 | 0.013 | 0.178 | 0.181 | -0.074 | **0.310** | 0.160 | **0.636** | **0.598** | 1 |  |
| Toileting assistance | 0.031 | 0.177 | -0.009 | 0.156 | **0.368** | **0.350** | -0.094 | -0.116 | -0.076 | **0.431** | **0.441** | **0.431** | **0.457** | **0.439** | **0.443** | **0.422** | **0.446** | **0.424** | **0.424** | 0.128 | 0.289 | -0.019 | 0.041 | 0.126 | 0.027 | 0.218 | 0.215 | -0.103 | **0.411** | 0.191 | **0.583** | **0.654** | **0.674** | 1 |

Note: Bold type without underline indicates that the absolute coefficient is > 0.3.

Abbreviation: BMI, body mass index.

**Supplementary Table 5.** Patient background at admission according to the presence or absence of falls for each bedridden rank group (test set, N=7,562)

| **Variable** | **Category (Unit)** | **Bedriddenness ranka** | | | | | | | | | | | |
| --- | --- | --- | --- | --- | --- | --- | --- | --- | --- | --- | --- | --- | --- |
| **Rank J** | | **P-valueb** | **Rank A** | | **P-valueb** | **Rank B** | | **P-valueb** | **Rank C** | | **P-valueb** |
| **N＝4592** | | **N＝1437** | | **N＝470** | | **N＝1063** | |
| **Without fall** | **With fall** | **Without fall** | **With fall** | **Without fall** | **With fall** | **Without fall** | **With fall** |
| **N＝4562** | **N＝30** | **N＝1389** | **N＝48** | **N＝451** | **N=19** | **N＝1030** | **N＝33** |
| Duration of admission | (day) | 10.1±11.0 | 34.9±32.9 | <0.001 | 14.0±14.6 | 37.5±28.1 | <0.001 | 18.0±14.4 | 43.0±33.6 | <0.001 | 20.2±21.2 | 38.5±27.7 | 0.051 |
| Time to fall | (day) | 9.9±10.7 | 12.7±9.3 | 0.414 | 13.7±14.2 | 18.4±21.0 | 0.010 | 17.4±14.4 | 15.2±13.8 | 0.893 | 19.7±20.8 | 20.2±22.4 | 0.549 |
| Age | (years) | 63.6±15.7 | 71.8±11.6 | 0.044 | 70.33±15.2 | 73.5±12.1 | 0.030 | 73.5±14.6 | 75.3±9.8 | 0.147 | 74.2±15.4 | 74.3±12.3 | 0.053 |
| Sex | Women | 1965 (99.5) | 9 (0.5) | 0.149 | 629 (97.8) | 14 (2.2) | 0.027 | 6205 (97.2) | 6 (2.8) | 0.234 | 488 (98.0) | 10 (2.0) | 0.053 |
| Men | 2597 (99.2) | 21 (0.8) |  | 760 (95.7) | 34 (4.3) |  | 246 (95.0) | 13 (5.0) |  | 542 (95.9) | 23 (4.1) |  |
| Height | (cm) | 161.1±8.9 | 161.0±8.6 | 0.553 | 158.6±9.7 | 158.7±8.6 | 0.285 | 157.4±10.0 | 159.4±9.9 | 0.929 | 157.4±10.3 | 157.2±10.3 | 0.451 |
| Weight | (kg) | 60.3±13.0 | 56.7±9.8 | 0.080 | 57.2±13.2 | 53.9±11.7 | 0.597 | 53.7±12.0 | 53.1±13.4 | 0.517 | 54.3±14.0 | 52.7±9.9 | 0.064 |
| BMI | (kg/m2) | 23.1±4.1 | 22.0±3.9 | 0.967 | 22.6±4.4 | 21.3±3.9 | 0.683 | 21.6±4.2 | 20.7±4.1 | 0.968 | 21.8±4.4 | 20.3±2.9 | 0.030 |
| Emergency admission | No | 3702 (99.5) | 20 (0.5) | 0.094 | 660 (96.5) | 24 (3.5) | 0.859 | 74 (94.9) | 4 (5.1) | 0.851 | 62 (100) | 0 (0) | 0.330 |
| Yes | 829 (98.8) | 10 (1.2) |  | 723 (96.8) | 24 (3.2) |  | 376 (96.2) | 15 (3.8) |  | 965 (96.7) | 33 (3.3) |  |
| Missing category | 31 (100) | 0 (0) |  | 6 (100) | 0 (0) |  | 1 (100) | 0 (0) |  | 3 (100) | 0 (0) |  |
| Ambulance transport | No | 4423 (99.4) | 28 (0.6) | 0.252 | 1192 (97.0) | 37 (3.0) | 0.091 | 307 (95.9) | 13 (4.1) | 0.974 | 346 (98.9) | 4 (1.1) | 0.010 |
| Yes | 139 (98.6) | 2 (1.4) |  | 197 (94.7) | 11 (5.3) |  | 144 (96.0) | 6 (4.0) |  | 684 (95.9) | 29 (4.1) |  |
| Dementia | Absence | 4438 (99.4) | 29 (0.6) | 0.836 | 1352 (96.6) | 47 (3.4) | 0.805 | 441 (96.1) | 18 (3.9) | 0.390 | 1003 (96.9) | 22 (3.1) | 0.885 |
| Presence | 124 (99.2) | 1 (0.8) |  | 37 (97.4) | 1 (2.6) |  | 10 (90.9) | 1 (9.1) |  | 27 (96.4) | 1 (3.6) |  |
| Parkinson's disease | Absence | 4545 (99.3) | 30 (0.7) | 0.738 | 1368 (96.7) | 47 (3.3) | 0.751 | 440 (95.9) | 19 (4.1) | 0.491 | 1007 (97.0) | 31 (3.0) | 0.153 |
| Presence | 17 (100) | 0 (0) |  | 21 (95.5) | 1 (4.5) |  | 11 (100) | 0 (0) |  | 23 (92.0) | 2 (8.0) |  |
| Stroke | Absence | 4336 (99.4) | 26 (0.6) | 0.036 | 1205 (96.8) | 40 (3.2) | 0.494 | 355 (95.7) | 16 (4.3) | 0.565 | 784 (96.7) | 27 (3.3) | 0.448 |
| Presence | 226 (98.3) | 4 (1.7) |  | 184 (95.8) | 8 (4.2) |  | 96 (97.0) | 3 (3.0) |  | 246 (97.6) | 6 (2.4) |  |
| Visual impairment | Absence | 4090 (99.3) | 27 (0.7) | 0.950 | 1178 (96.9) | 38 (3.1) | 0.287 | 378 (95.7) | 17 (4.3) | 0.509 | 906 (96.7) | 31 (3.3) | 0.296 |
| Presence | 472 (99.4) | 3 (0.6) |  | 211 (95.5) | 10 (4.5) |  | 73 (97.3) | 2 (2.7) |  | 124 (98.4) | 2 (1.6) |  |
| Use of care insurance | No | 920 (99.6) | 4 (0.4) | 0.126 | 253 (96.6) | 9 (3.4) | 0.730 | 60 (95.2) | 3 (4.8) | 0.932 | 185 (96.4) | 7 (3.6) | 0.042 |
| Yes | 246 (98.4) | 4 (1.6) |  | 268 (96.0) | 12 (4.0) |  | 185 (95.9) | 8 (4.1) |  | 439 (98.4) | 7 (1.6) |  |
| Missing category | 3396 (99.4) | 22 (0.6) |  | 850 (96.9) | 27 (3.1) |  | 206 (96.3) | 8 (3.7) |  | 406 (95.5) | 19 (4.5) |  |
| Presence of cognitive function scores | No | 4313 (99.3) | 29 (0.7) | 0.439 | 1252 (96.7) | 43 (3.3) | 0.57 | 352 (96.4) | 13 (3.6) | 0.516 | 756 (97.0) | 23 (3.0) | 0.675 |
| Yes | 76 (98.7) | 1 (1.3) |  | 113 (95.8) | 5 (4.2) |  | 95 (94.1) | 6 (5.9) |  | 261 (96.3) | 10 (3.7) |  |
| Missing category | 173 (100) | 0 (0) |  | 24 (100) | 0 (0) |  | 4 (100) | 0 (0) |  | 13 (100) | 0 (0) |  |
| Inpatient ward | Internal medicine | 2430 (99.2) | 19 (0.8) | 0.507 | 842 (97.1) | 25 (2.9) | 0.467 | 293 (96.1) | 12 (3.9) | 0.851 | 530 (97.6) | 13 2.40) | 0.013 |
| Department of Surgery | 2097 (99.5) | 11 (0.5) |  | 515 (95.9) | 22 (2.1) |  | 126 (96.2) | 5 (3.8) |  | 349 (97.5) | 9 (2.5) |  |
| Emergency Department | 35 (100) | 0 (0) |  | 32 (97.0) | 1 (3.0) |  | 32 (94.1) | 2 (5.9) |  | 151 (93.2) | 11 (6.8) |  |
| Disturbance of consciousness | Absence | 4505 (99.4) | 29 (0.6) | 0.593 | 1258 (96.8) | 101 (2.5) | 0.451 | 351 (95.9) | 15 (4.1) | 0.908 | 589 (97.4) | 16 (2.6) | 0.597 |
| Presence | 57 (98.3) | 1 (1.7) |  | 104 (95.4) | 14 (4.3) |  | 100 (96.2) | 4 (3.8) |  | 440 (96.3) | 17 (3.7) |  |
| Missing category | 1 (100) | 0 (0.0) |  | 0 (0) | 0 (0) |  | 0 (0) | 0 (0) |  | 1 (100) | 0 (0) |  |
| Eating | Independent | 4458 (99.4) | 28 (0.6) | 0.200 | 1112 (97.1) | 33 (2.9) | 0.084 | 144 (97.3) | 4 (2.7) | 0.482 | 173 (98.9) | 2 (1.1) | 0.236 |
| Requiring assistance | 93 (97.9) | 2 (2.1) |  | 262 (94.6) | 15 (5.4) |  | 299 (95.2) | 15 (4.8) |  | 815 (96.4) | 36 (3.6) |  |
| Missing category | 11 (100) | 0 (0) |  | 15 (100) | 0 (0) |  | 8 (100) | 0 (0) |  | 42 (97.7) | 1 (2.3) |  |
| Transferring | Independent | 4353 (99.4) | 28 (0.6) | 0.839 | 885 (97.6) | 22 (2.4) | 0.038 | 81 (97.6) | 2 (2.4) | 0.673 | 128 (98.5) | 2 (1.5) | 0.472 |
| Requiring assistance | 205 (99.0) | 2 (1.0) |  | 502 (95.1) | 26 (4.9) |  | 368 (95.6) | 17 (4.4) |  | 894 (96.6) | 31 (3.4) |  |
| Missing category | 4 (100) | 0 (0) |  | 2 (100) | 0 (0) |  | 2 (100) | 0 (0) |  | 8 (100) | 0 (0) |  |
| Dressing | Independent | 4464 (99.4) | 28 (0.6) | 0.146 | 1103 (96.8) | 36 (3.2) | 0.570 | 154 (97.5) | 4 (2.5) | 0.265 | 165 (98.2) | 3 (1.8) | 0.354 |
| Requiring assistance | 87 (97.8) | 2 (2.2) |  | 275 (95.8) | 12 (4.2) |  | 290 (95.4) | 14 (4.6) |  | 841 (96.6) | 30 (3.4) |  |
| Missing category | 11 (100) | 0 (0) |  | 11 (100) | 0 (0) |  | 7 (87.5) | 1 (12.5) |  | 24 (100) | 0 (0) |  |
| Moving and using the toilet | Independent | 4429 (99.4) | 28 (0.6) | 0.392 | 998 (97.0) | 31 (3.0) | 0.452 | 97 (99.0) | 1 (1.0) | 0.182 | 138 (97.9) | 3 (2.1) | 0.483 |
| Requiring assistance | 122 (98.4) | 2 (1.6) |  | 384 (95.8) | 17 (4.2) |  | 346 (95.1) | 18 (4.9) |  | 866 (96.7) | 30 (3.3) |  |
| Missing category | 11 (100) | 0 (0) |  | 7 (100) | 0 (0) |  | 8 (100) | 0 (0) |  | 26 (100) | 0 (0) |  |
| Bathing | Independent | 4401 (99.4) | 28 (0.6) | 0.425 | 918 (97.1) | 27 (2.9) | 0.265 | 93 (98.9) | 1 (1.1) | 0.237 | 135 (98.5) | 2 (1.5) | 0.265 |
| Requiring assistance | 131 (98.5) | 2 (1.5) |  | 373 (95.4) | 18 (4.6) |  | 306 (95.0) | 16 (5.0) |  | 817 (96.5) | 30 (3.5) |  |
| Missing category | 30 (100) | 0 (0) |  | 98 (97.0) | 3 (3.0) |  | 52 (96.3) | 2 (3.7) |  | 78 (98.7) | 1 (1.3) |  |
| Walking on level ground | Independent | 4393 (99.4) | 28 (0.6) | 0.577 | 955 (97.5) | 24 (2.5) | 0.015 | 87 (98.9) | 1 (1.1) | 0.283 | 136 (98.6) | 2 (1.4) | 0.484 |
| Requiring assistance | 153 (98.7) | 2 (1.3) |  | 397 (94.5) | 23 (5.5) |  | 333 (95.4) | 16 (4.6) |  | 833 (96.6) | 29 (3.4) |  |
| Missing category | 16 (100) | 0 (0) |  | 37 (97.4) | 1 (2.6) |  | 31 (93.9) | 2 (6.1) |  | 61 (96.8) | 2 (3.2) |  |
| Stair climbing | Independent | 4338 (99.4) | 28 (0.6) | 0.523 | 856 (97.3) | 24 (2.7) | 0.091 | 81 (98.8) | 1 (1.2) | 0.119 | 132 (98.5) | 2 (1.5) | 0.250 |
| Requiring assistance | 159 (98.8) | 2 (1.2) |  | 379 (95.0) | 20 (5.0) |  | 275 (94.5) | 16 (5.5) |  | 814 (96.4) | 30 (3.6) |  |
| Missing category | 65 (100) | 0 (0) |  | 154 (97.5) | 4 (2.5) |  | 95 (97.9) | 2 (2.1) |  | 84 (98.8) | 1 (1.2) |  |
| Changing clothes | Independent | 4413 (99.4) | 28 (0.6) | 0.519 | 993 (97.2) | 29 (2.8) | 0.186 | 95 (96.9) | 3 (3.1) | 0.654 | 140 (97.9) | 3 (2.1) | 0.622 |
| Requiring assistance | 141 (98.6) | 2 (1.4) |  | 387 (95.3) | 19 (4.7) |  | 345 (95.6) | 16 (4.4) |  | 879 (96.7) | 30 (3.3) |  |
| Missing category | 8 (100) | 0 (0) |  | 9 (100) | 0 (0) |  | 11 (100) | 0 (0) |  | 11 (100) | 0 (0) |  |
| Defecation management | Independent | 4480 (99.4) | 28 (0.6) | 0.076 | 1167 (96.8) | 38 (3.2) | 0.332 | 192 (97.0) | 6 (3.0) | 0.373 | 190 (96.4) | 7 (3.6) | 0.468 |
| Requiring assistance | 70 (97.2) | 2 (2.8) |  | 200 (95.2) | 10 (4.8) |  | 242 (94.9) | 13 (5.1) |  | 797 (96.8) | 26 (3.2) |  |
| Missing category | 12 (100) | 0 (0) |  | 22 (100) | 0 (0) |  | 17 (100) | 0 (0) |  | 43 (100) | 0 (0) |  |
| Urination management | Independent | 4477 (99.4) | 28 (0.6) | 0.089 | 1168 (96.8) | 38 (3.2) | 0.337 | 190 (96.9) | 6 (3.1) | 0.389 | 187 (96.9) | 6 (3.1) | 0.511 |
| Requiring assistance | 73 (97.3) | 2 (2.7) |  | 200 (95.2) | 10 (4.8) |  | 244 (94.9) | 13 (5.1) |  | 803 (96.7) | 27 (3.3) |  |
| Missing category | 12 (100) | 0 (0) |  | 21 (100) | 0 (0) |  | 17 (100) | 0 (0) |  | 40 (100) | 0 (0) |  |
| Good sleep condition | Yes | 2968 (99.4) | 19 (0.6) | 0.919 | 665 (96.0) | 28 (4.0) | 0.361 | 172 (95.6) | 8 (4.4) | 0.925 | 253 (98.8) | 3 (1.2) | 0.120 |
| No | 641 (99.2) | 5 (0.8) |  | 260 (97.4) | 7 (2.6) |  | 69 (95.8) | 3 (4.2) |  | 69 (95.8) | 3 (4.2) |  |
| Missing category | 953 (99.4) | 6 (0.6) |  | 464 (97.3) | 13 (2.7) |  | 210 (96.3) | 8 (3.7) |  | 708 (96.3) | 27 (3.7) |  |
| Use of sleeping pills | Absence | 1754 (99.4) | 17 (0.6) | 0.896 | 628 (96.5) | 23 (3.5) | 0.904 | 157 (95.7) | 7 (4.3) | 0.983 | 178 (97.3) | 5 (2.7) | 0.743 |
| Presence | 464 (99.4) | 3 (0.6) |  | 166 (96.5) | 6 (3.5) |  | 50 (96.2) | 2 (3.8) |  | 59 (98.3) | 1 (1.7) |  |
| Missing category | 1344 (99.3) | 10 (0.7) |  | 595 (96.9) | 19 (3.1) |  | 244 (96.1) | 10 (3.9) |  | 793 (96.7) | 27 (3.3) |  |
| Medication management status | Myself | 2296 (99.4) | 14 (0.6) | 0.818 | 480 (97.2) | 14 (2.8) | 0.581 | 83 (94.3) | 51 (5.7) | 0.627 | 59 (98.3) | 1 (1.7) | 0.326 |
| Others | 89 (98.9) | 1 (1.1 |  | 100 (95.2) | 5 (4.8) |  | 621 (95.4) | 3 (4.6) |  | 100 (99.0) | 1 (1.0) |  |
| Missing category | 2177 (99.3) | 15 (0.7) |  | 809 (96.5) | 29 (3.5) |  | 306 (96.5) | 11 (3.5) |  | 871 (96.6) | 31 (3.4) |  |
| History of falls within 1 year | Absence | 3909 (99.4) | 24 (0.6) | 0.169 | 1061 (97.1) | 32 (2.9) | 0.128 | 305 (96.5) | 11 (3.5) | 0.652 | 585 (97.2) | 17 (2.8) | 0.776 |
| Presence | 251 (98.4) | 4 (1.6) |  | 179 (94.2) | 11 (5.8) |  | 85 (94.4) | 5 (5.6) |  | 258 (96.3) | 10 (3.7) |  |
| Missing category | 402 (99.5) | 2 (0.5) |  | 149 (96.8) | 5 (3.2) |  | 61 (95.3) | 3 (4.7) |  | 187 (96.9) | 6 (3.1) |  |
| Inability to stand without holding | Absence | 3373 (99.4) | 19 (0.6) | 0.041 | 455 (97.4) | 12 (2.6) | 0.196 | 23 (100) | 0 (0) | 0.379 | 78 (98.7) | 1 (1.3) | 0.301 |
| Presence | 768 (98.7) | 10 (1.3) |  | 847 (96.0) | 35 (4.0) |  | 409 (95.6) | 19 (4.4) |  | 885 (96.9) | 28 (3.1) |  |
| Missing category | 421 (99.8) | 1 (0.2) |  | 87 (98.9) | 1 (1.1) |  | 19 (100) | 0 (0) |  | 67 (94.4) | 4 (5.6) |  |
| Impaired judgment and comprehension | Absence | 3965 (99.3) | 28 (0.7) | 0.512 | 1063 (96.8) | 35 (3.2) | 0.112 | 288 (96.3) | 11 (3.7) | 0.859 | 450 (97.2) | 13 (2.8) | 0.713 |
| Presence | 120 (100) | 0 (0) |  | 164 (94.3) | 10 (5.7) |  | 106 (95.5) | 5 (4.5) |  | 427 (96.4) | 16 (3.6) |  |
| Missing category | 477 (99.6) | 2 (0.4) |  | 162 (98.2) | 3 (1.8) |  | 57 (95.0) | 3 (5.0) |  | 153 (97.5) | 4 (2.5) |  |
| Toileting assistance | Absence | 3814 (99.3) | 25 (0.7) | 0.493 | 874 (97.2) | 25 (2.8) | 0.180 | 132 (98.6) | 2 (1.5) | 0.095 | 228 (95.8) | 10 (4.2) | 0.486 |
| Presence | 163 (100) | 0 (0) |  | 356 (95.2) | 18 (4.8) |  | 268 (94.4) | 16 (5.6) |  | 627 (97.4) | 17 (2.6) |  |
| Missing category | 585 (99.2) | 5 (0.8) |  | 159 (97.0) | 5 (3.0) |  | 51 (98.1) | 1 (1.9) |  | 175 (96.7) | 6 (3.3) |  |
| Use of portable toilet | Absence | 3726 (99.3) | 26 (0.7) | 0.681 | 1018 (96.9) | 33 (3.1) | 0.667 | 272 (96.8) | 9 (3.2) | 0.529 | 698 (97.1) | 21 (2.9) | 0.664 |
| Presence | 71 (100) | 0 (0) |  | 149 (96.8) | 5 (3.2) |  | 91 (94.8) | 5 (5.2) |  | 34 (94.4) | 2 (5.6) |  |
| Missing category | 765 (99.5) | 4 (0.5) |  | 222 (95.7) | 10 (4.3) |  | 88 (94.6) | 5 (5.4) |  | 298 (96.8) | 10 (3.2) |  |

Note: Categorical variables are presented as number of patients and percentages, and continuous variables are presented as mean and standard error.

Abbreviation: BMI, body mass index.

**a** Bedriddenness rank: J, independence/autonomy; A, house-bound; B, chair-bound; C, bed-bound.

**b** Intergroup comparisons were made using t-test and chi-square test for continuous and categorical variables, respectively.

**Supplementary Table 6.** Patient background at admission according to the presence or absence of falls for each bedridden rank group (validation set, N=15,426)

| **Variable** | **Category (Unit)** | **Bedriddenness ranka** | | | | | | | | | | | |
| --- | --- | --- | --- | --- | --- | --- | --- | --- | --- | --- | --- | --- | --- |
| **Rank J** | | **P-valueb** | **Rank A** | | **P-valueb** | **Rank B** | | **P-valueb** | **Rank C** | | **P-valueb** |
| **N＝9274** | | **N＝2966** | | **N＝969** | | **N＝2217** | |
| **Without fall** | **With fall** | **Without fall** | **With fall** | **Without fall** | **With fall** | **Without fall** | **With fall** |
| **N＝9184** | **N＝90** | **N＝2899** | **N＝67** | **N＝926** | **N＝43** | **N＝2147** | **N＝70** |
| Duration of admission | (day) | 10.1±11.2 | 40.1±42.9 | <0.001 | 13.9±14.4 | 28.4±29.5 | <0.001 | 16.7±15.7 | 26.7±19.5 | 0.046 | 18.7±19.5 | 32.1±21.9 | 0.034 |
| Time to fall | (day) | 10.0±11.0 | 20.1±27.4 | <0.001 | 13.5±14.0 | 13.4±21.3 | 0.295 | 16.3±15.5 | 13.2±11.9 | 0.441 | 18.4±19.3 | 14.4±13.0 | 0.083 |
| Age | (years) | 63.3±15.8 | 72.7±11.5 | <0.001 | 69.9±14.7 | 75.6±9.6 | 0.002 | 73.7±13.9 | 78.5±9.3 | 0.031 | 74.1±15.6 | 74.8±14.0 | 0.168 |
| Sex | Women | 4141 (99.4) | 26 (0.6) | 0.002 | 1279 (98.2) | 23 (1.8) | 0.110 | 426 (95.9) | 18 (4.1) | 0.596 | 1023 (97.0) | 32 (3.0) | 0.750 |
| Men | 5043 (98.7) | 64 (1.3) |  | 1620 (97.4) | 44 (2.6) |  | 500 (95.2) | 25 (4.8) |  | 1124 (96.7) | 38 (3.3) |  |
| Height | (cm) | 161.1±8.9 | 161.1±8.8 | 0.630 | 158.7±9.9 | 159.8±8.4 | 0.082 | 157.0±10.3 | 154.4±9.1 | 0.308 | 157.3±10.4 | 156.5±10.3 | 0.724 |
| Weight | (kg) | 60.2±12.8 | 56.9±12.1 | 0.319 | 56.6±12.7 | 56.2±13.1 | 0.923 | 53.9±13.0 | 50.3±12.2 | 0.613 | 53.6±13.7 | 51.3±13.8 | 0.858 |
| BMI | (kg/m2) | 23.1±4.1 | 21.9±3.9 | 0.800 | 22.4±4.2 | 21.9±3.9 | 0.646 | 21.7±4.5 | 21.0±4.2 | 0.964 | 21.5±4.3 | 20.7±4.1 | 0.374 |
| Emergency admission | No | 7545 (99.3) | 57 (0.7) | <0.001 | 1418 (98.3) | 25 (1.7) | 0.127 | 157 (94.6) | 9 (5.4) | 0.731 | 123 (98.4) | 2 (1.6) | 0.524 |
| Yes | 1583 (98.0) | 33 (2.0) |  | 1464 (97.2) | 42 (2.8) |  | 765 (95.7) | 34 (4.3) |  | 2017 (96.7) | 68 (3.3) |  |
| Missing category | 56 (100) | 0 (0) |  | 17 (100) | 0 (0) |  | 4 (100) | 0 (0) |  | 7 (100) | 0 (0) |  |
| Ambulance transport | No | 8939 (99.1) | 79 (0.9) | <0.001 | 2513 (97.7) | 59 (2.3) | 0.743 | 665 (95.5) | 31 (4.5) | 0.968 | 691 (97.3) | 19 (2.7) | 0.374 |
| Yes | 245 (95.7) | 11 (4.3) |  | 386 (98.0) | 8 (2.0) |  | 261 (95.6) | 12 (4.4) |  | 1456 (96.6) | 51 (3.4) |  |
| Dementia | Absence | 8933 (99.0) | 88 (1.0) | 0.767 | 2802 (97.8) | 64 (2.2) | 0.612 | 903 (95.5) | 43 (4.5) | 0.296 | 2096 (96.8) | 69 (3.2) | 0.606 |
| Presence | 251 (99.2) | 2 (0.8) |  | 97 (97.0) | 3 (3.0) |  | 23 (100) | 0 (0) |  | 51 (98.1) | 1 (1.9) |  |
| Parkinson's disease | Absence | 9157 (99.0) | 90 (1.0) | 0.606 | 2862 (97.8) | 64 (2.2) | 0.025 | 905 (95.6) | 42 (4.4) | 0.980 | 2101 (96.9) | 68 (3.1) | 0.686 |
| Presence | 27 (100) | 0 (0) |  | 37 (92.5) | 3 (7.5) |  | 21 (95.5) | 1 (4.5) |  | 46 (95.8) | 2 (4.2) |  |
| Stroke | Absence | 8672 (99.1) | 78 (0.9) | 0.002 | 2530 (97.8) | 56 (2.2) | 0.372 | 760 (95.8) | 33 (4.2) | 0.376 | 1731 (97.0) | 54 (3.0) | 0.469 |
| Presence | 512 (97.7) | 12 (2.3) |  | 369 (97.1) | 11 (2.9) |  | 166 (94.3) | 10 (5.7) |  | 416 (96.3) | 16 (3.7) |  |
| Visual impairment | Absence | 8250 (99.0) | 80 (1.0) | 0.769 | 2510 (97.7) | 60 (2.3) | 0.480 | 760 (95.8) | 33 (4.2) | 0.376 | 1893 (96.6) | 67 (3.4) | 0.052 |
| Presence | 934 (98.9) | 10 (1.1) |  | 389 (98.2) | 7 (1.8) |  | 166 (94.3) | 10 (5.7) |  | 254 (98.8) | 3 (1.2) |  |
| Use of care insurance | No | 1879 (98.7) | 24 (1.3) | 0.002 | 551 (98.7) | 7 (1.3) | 0.095 | 767 (95.9) | 33 (4.1) | 0.304 | 372 (97.1) | 11 (2.9) | 0.938 |
| Yes | 405 (97.6) | 10 (2.4) |  | 621 (96.9) | 20 (3.1) |  | 159 (94.1) | 10 (5.9) |  | 865 (96.8) | 29 (3.2) |  |
| Missing category | 6900 (99.2) | 56 (0.8) |  | 1727 (97.7) | 40 (2.3) |  | 926 (95.6) | 43 (4.4) |  | 910 (96.8) | 30 (3.2) |  |
| Presence of cognitive function scores | No | 8658 (99.0) | 88 (1.0) | 0.103 | 2644 (98.0) | 55 (2.0) | 0.001 | 119 (96.0) | 5 (4.0) | 0.956 | 1547 (97.1) | 46 (2.9) | 0.176 |
| Yes | 124 (98.4) | 2 (1.6) |  | 198 (94.3) | 12 (5.7) |  | 391 (95.4) | 19 (4.6) |  | 559 (95.9) | 24 (4.1) |  |
| Missing category | 402 (100) | 0 (0) |  | 57 (100) | 0 (0) |  | 416 (95.6) | 19 (4.4) |  | 41 (100) | 0 (0) |  |
| Inpatient ward | Internal medicine | 4977 (99.1) | 44 (0.9) | 0.001 | 1650 (97.9) | 35 (2.1) | 0.747 | 745 (95.6) | 34 (4.4) | 0.738 | 1056 (96.7) | 36 (3.3) | 0.814 |
| Department of Surgery | 4132 (99.0) | 42 (1.0) |  | 1172 (97.5) | 30 (2.5) |  | 171 (95.0) | 9 (5.0) |  | 689 (96.8) | 23 (3.2) |  |
| Emergency Department | 75 (94.9) | 4 (5.1) |  | 77 (97.5) | 2 (2.5) |  | 10 (100) | 0 (0) |  | 402 (97.3) | 11 (2.7) |  |
| Disturbance of consciousness | Absence | 9079 (99.1) | 86 (0.9) | 0.004 | 2689 (97.9) | 28 (2.1) | 0.154 | 595 (95.5) | 28 (4.5) | 0.964 | 1274 (97.7) | 29 (2.3) | 0.006 |
| Presence | 105 (96.3) | 4 (3.7) |  | 209 (95.9) | 9 (4.1) |  | 273 (96.3) | 12 (4.2) |  | 900 (95.6) | 41 (4.4) |  |
| Missing category | 0 (0) | 0 (0) |  | 1 (100) | 0 (0) |  | 58 (95.1) | 3 (4.9) |  | 0 (0) | 0 (0) |  |
| Eating | Independent | 8972 (99.2) | 73 (0.8) | <0.001 | 2274 (98.1) | 43 (1.9) | 0.016 | 762 (95.4) | 37 (4.6) | 0.806 | 374 (98.9) | 4 (1.1) | 0.033 |
| Requiring assistance | 194 (92.4) | 16 (7.6) |  | 589 (96.4) | 22 (3.6) |  | 163 (96.4) | 6 (3.6) |  | 1698 (96.4) | 64 (3.6) |  |
| Missing category | 18 (94.7) | 1 (5.3) |  | 36 (94.7) | 2 (5.3) |  | 1 (100) | 0 (0) |  | 75 (97.4) | 2 (2.6) |  |
| Transferring | Independent | 8758 (99.2) | 71 (0.8) | <0.001 | 1874 (98.5) | 29 (1.5) | 0.001 | 356 (97.3) | 10 (2.7) | 0.117 | 276 (99.3) | 2 (0.7) | 0.037 |
| Requiring assistance | 422 (95.7) | 19 (4.3) |  | 1015 (96.4) | 38 (3.6) |  | 545 (94.6) | 31 (5.4) |  | 1856 (96.5) | 67 (3.5) |  |
| Missing category | 4 (100) | 0 (0) |  | 10 (100) | 0 (0) |  | 25 (92.6) | 2 (7.4) |  | 15 (93.8) | 1 (6.3) |  |
| Dressing | Independent | 8980 (99.2) | 76 (0.8) | <0.001 | 2322 (97.9) | 49 (2.1) | 0.231 | 195 (97.5) | 5 (2.5) | 0.085 | 360 (98.9) | 4 (1.1) | 0.044 |
| Requiring assistance | 191 (93.6) | 13 (6.4) |  | 555 (96.9) | 18 (3.1) |  | 727 (95.2) | 37 (4.8) |  | 1746 (96.4) | 65 (3.6) |  |
| Missing category | 13 (92.9) | 1 (7.1) |  | 22 (100) | 0 (0) |  | 4 (80.0) | 1 (20.0) |  | 41 (97.6) | 1 (2.4) |  |
| Moving and using the toilet | Independent | 8990 (99.1) | 77 (0.9) | <0.001 | 2111 (98.4) | 34 (1.6) | <0.001 | 360 (97.6) | 9 (2.4) | 0.014 | 302 (99.3) | 2 (0.7) | 0.027 |
| Requiring assistance | 265 (95.3) | 13 (4.7) |  | 765 (96.0) | 32 (4.0) |  | 555 (94.5) | 32 (5.5) |  | 1794 (96.5) | 66 (3.5) |  |
| Missing category | 10 (100) | 0 (0) |  | 23 (95.8) | 1 (4.2) |  | 11 (84.6) | 2 (15.4) |  | 51 (96.2) | 2 (3.8) |  |
| Bathing | Independent | 8828 (99.2) | 73 (0.8) | <0.001 | 1957 (98.3) | 33 (1.7) | 0.006 | 265 (97.8) | 6 (2.2) | 0.086 | 284 (99.3) | 2 (0.7) | 0.038 |
| Requiring assistance | 297 (95.2) | 15 (4.8) |  | 773 (96.4) | 29 (3.6) |  | 652 (94.8) | 36 (5.2) |  | 1709 (96.5) | 62 (3.5) |  |
| Missing category | 59 (96.7) | 2 (3.3) |  | 169 (97.1) | 5 (2.9) |  | 9 (90.0) | 1 (10.0) |  | 154 (96.3) | 6 (3.8) |  |
| Walking on level ground | Independent | 8841 (99.2) | 73 (0.8) | <0.001 | 1992 (98.4) | 32 (1.6) | <0.001 | 216 (98.2) | 4 (1.8) | 0.071 | 288 (99.3) | 2 (0.7) | 0.024 |
| Requiring assistance | 321 (95.3) | 16 (4.7) |  | 842 (96.0) | 35 (4.0) |  | 606 (94.5) | 35 (5.5) |  | 1727 (96.4) | 65 (3.6) |  |
| Missing category | 22 (95.7) | 1 (4.3) |  | 65 (100) | 0 (0) |  | 104 (96.3) | 4 (3.7) |  | 132 (97.8) | 3 (2.2) |  |
| Stair climbing | Independent | 8731 (99.2) | 69 (0.8) | <0.001 | 1816 (98.6) | 26 (1.4) | <0.001 | 218 (97.3) | 6 (2.7) | 0.154 | 272 (99.3) | 2 (0.7) | 0.033 |
| Requiring assistance | 325 (95.6) | 15 (4.4) |  | 744 (96.2) | 29 (3.8) |  | 650 (94.8) | 36 (5.2) |  | 1676 (96.4) | 63 (3.6) |  |
| Missing category | 128 (95.5) | 6 (4.5) |  | 339 (96.6) | 126 (3.4) |  | 58 (98.3) | 1 (1.7) |  | 199 (97.5) | 5 (2.5) |  |
| Changing clothes | Independent | 8890 (99.2) | 74 (0.8) | <0.001 | 2482 (97.9) | 52 (2.1) | 0.180 | 203 (98.1) | 4 (1.9) | 0.142 | 297 (99.3) | 2 (0.7) | 0.030 |
| Requiring assistance | 284 (95.0) | 15 (5.0) |  | 368 (96.6) | 13 (3.4) |  | 540 (94.9) | 29 (5.1) |  | 1823 (96.5) | 67 (3.5) |  |
| Missing category | 10 (90.9) | 1 (9.1) |  | 49 (96.1) | 2 (3.9) |  | 183 (94.8) | 10 (5.2) |  | 27 (96.4) | 1 (3.6) |  |
| Defecation management | Independent | 9023 (99.2) | 77 (0.8) | <0.001 | 2482 (97.9) | 52 (2.1) | 0.180 | 259 (98.1) | 5 (1.9) | 0.063 | 415 (97.6) | 10 (2.4) | 0.445 |
| Requiring assistance | 142 (91.6) | 13 (8.4) |  | 368 (96.6) | 13 (3.4) |  | 649 (94.6) | 37 (5.4) |  | 1639 (96.6) | 58 (3.4) |  |
| Missing category | 16 (100) | 0 (0) |  | 49 (96.1) | 2 (3.9) |  | 18 (94.7) | 1 (5.3) |  | 93 (97.9) | 2 (2.1) |  |
| Urination management | Independent | 9016 (99.2) | 77 (0.8) | <0.001 | 2470 (98.0) | 51 (2.0) | 0.119 | 448 (96.1) | 18 (3.9) | 0.541 | 405 (97.6) | 10 (2.4) | 0.287 |
| Requiring assistance | 153 (92.2) | 13 (7.8) |  | 380 (96.4) | 14 (3.6) |  | 441 (94.8) | 24 (5.2) |  | 1652 (96.6) | 59 (3.4) |  |
| Missing category | 15 (100) | 0 (0) |  | 49 (96.1) | 2 (3.9) |  | 37 (97.4) | 1 (2.6) |  | 90 (98.9) | 1 (1.1) |  |
| Good sleep condition | Yes | 5917 (99.1) | 51 (0.9) | 0.004 | 1469 (97.5) | 38 (2.5) | 0.360 | 449 (96.6) | 16 (3.4) | 0.159 | 521 (96.8) | 17 (3.2) | 0.742 |
| No | 1310 (98.2) | 24 (1.8) |  | 499 (97.5) | 13 (2.5) |  | 437 (95.0) | 23 (5.0) |  | 162 (95.9) | 7 (4.1) |  |
| Missing category | 1957 (99.2) | 15 (0.8) |  | 931 (98.3) | 16 (1.7) |  | 40 (90.9) | 4 (9.1) |  | 1464 (97.0) | 46 (3.0) |  |
| Use of sleeping pills | Absence | 5384 (99.1) | 49 (0.9) | 0.197 | 1303 (97.5) | 34 (2.5) | 0.081 | 332 (95.4) | 16 (4.6) | 0.984 | 349 (96.9) | 11 (3.1) | 0.876 |
| Presence | 987 (98.5) | 15 (1.5) |  | 373 (96.6) | 13 (3.4) |  | 176 (95.7) | 8 (4.3) |  | 150 (96.2) | 6 (3.8) |  |
| Missing category | 2813 (99.1) | 26 (0.9) |  | 1223 (97.9) | 20 (1.6) |  | 418 (95.7) | 19 (4.3) |  | 1648 (96.9) | 53 (3.1) |  |
| Medication management status | Myself | 4505 (99.2) | 36 (0.8) | <0.001 | 942 (98.0) | 19 (2.0) | 0.020 | 308 (94.8) | 17 (5.2) | 0.577 | 131 (94.2) | 8 (5.8) | 0.140 |
| Others | 174 (96.1) | 7 (3.9) |  | 212 (95.1) | 11 (4.9) |  | 112 (94.9) | 6 (5.1) |  | 155 (98.1) | 3 (1.9) |  |
| Missing category | 4505 (99.0) | 47 (1.0) |  | 1745 (97.9) | 37 (2.1) |  | 506 (96.2) | 20 (3.8) |  | 1861 (96.9) | 59 (3.1) |  |
| History of falls within 1 year | Absence | 7928 (99.2) | 64 (0.8) | <0.001 | 2191 (98.1) | 43 (1.9) | 0.025 | 152 (96.2) | 6 (3.8) | 0.061 | 1213 (97.2) | 35 (2.8) | 0.464 |
| Presence | 515 (97.0) | 16 (3.0) |  | 369 (95.8) | 16 (4.2) |  | 129 (94.2) | 8 (5.8) |  | 569 (96.1) | 23 (3.9) |  |
| Missing category | 741 (98.7) | 10 (1.3) |  | 339 (97.7) | 8 (2.3) |  | 645 (95.7) | 29 (4.3) |  | 365 (96.8) | 12 (3.2) |  |
| Inability to stand without holding | Absence | 6931 (99.4) | 42 (0.6) | <0.001 | 863 (99.1) | 8 (0.9) | 0.005 | 69 (98.6) | 1 (1.4) | 0.442 | 175 (98.9) | 2 (1.1) | 0.272 |
| Presence | 1472 (97.4) | 40 (2.6) |  | 1841 (97.1) | 55 (2.9) |  | 812 (95.3) | 40 (4.7) |  | 1835 (96.7) | 63 (3.3) |  |
| Missing category | 781 (99.0) | 8 (1.0) |  | 195 (98.0) | 4 (2.0) |  | 45 (95.7) | 2 (4.3) |  | 137 (96.5) | 5 (3.5) |  |
| Impaired judgment and comprehension | Absence | 8049 (99.2) | 67 (0.8) | <0.001 | 2210 (98.0) | 45 (2.0) | 0.147 | 576 (95.8) | 25 (4.2) | 0.506 | 949 (96.9) | 30 (3.1) | 0.890 |
| Presence | 253 (95.5) | 12 (4.5) |  | 347 (96.4) | 13 (3.6) |  | 212 (94.2) | 13 (5.8) |  | 893 (96.6) | 31 (3.4) |  |
| Missing category | 882 (98.8) | 11 (1.2) |  | 342 (97.4) | 9 (2.6) |  | 138 (96.5) | 5 (3.5) |  | 305 (97.1) | 9 (2.9) |  |
| Toileting assistance | Absence | 7764 (99.2) | 66 (0.8) | <0.001 | 1823 (98.3) | 31 (1.7) | 0.002 | 256 (97.3) | 7 (2.7) | 0.188 | 481 (97.0) | 15 (3.0) | 0.887 |
| Presence | 279 (96.5) | 10 (3.5) |  | 714 (96.1) | 29 (3.9) |  | 543 (94.6) | 31 (5.4) |  | 1314 (96.9) | 42 (3.1) |  |
| Missing category | 1141 (98.8) | 14 (1.2) |  | 362 (98.1) | 7 (1.9) |  | 127 (96.2) | 5 (3.8) |  | 352 (96.4) | 13 (3.6) |  |
| Use of portable toilet | Absence | 7588 (99.1) | 67 (0.9) | 0.001 | 2104 (98.1) | 41 (1.9) | 0.005 | 549 (96.0) | 23 (4.0) | 0.099 | 1472 (96.9) | 47 (3.1) | 0.788 |
| Presence | 123 (96.1) | 5 (3.9) |  | 295 (95.2) | 15 (4.8) |  | 182 (92.9) | 14 (7.1) |  | 87 (95.6) | 4 (4.4) |  |
| Missing category | 1473 (98.8) | 18 (1.2) |  | 500 (97.8) | 11 (2.2) |  | 195 (97.0) | 6 (3.0) |  | 588 (96.9) | 19 (3.1) |  |

Note: Categorical variables are presented as number of patients and percentages, and continuous variables are presented as mean and standard error.

Abbreviation: BMI, body mass index

**a** Bedriddenness rank: J, independence/autonomy; A, house-bound; B, chair-bound; C, bed-bound.

**b** Intergroup comparisons were made using t-test and chi-square test for continuous and categorical variables, respectively.

**Supplementary Table 7.** Patients background of the entire population (N=22,988)

| **Variable** | **Category (Unit)** | **Without fall N＝23703** | **With fall N＝400** | **P-valuea** |
| --- | --- | --- | --- | --- |
|
| Duration of admission | (day) | 12.6±14.2 | 34.5±31.4 | <0.001 |
| Time to fall | (day) | 12.4±13.9 | 16.3±20.0 | <0.001 |
| Age | (years) | 66.7±16.2 | 74.5±11.6 | <0.001 |
| Sex | Women | 10682 (98.7) | 138 (1.3) | <0.001 |
| Men | 13021 (98.0) | 262 (2.0) |  |
| Height | (cm) | 159.9±9.6 | 158.6±9.3 | 0.011 |
| Weight | (kg) | 58.4±13.3 | 54.2±12.4 | <0.001 |
| BMI | (kg/m2) | 22.7±4.2 | 54.2±12.4 | <0.001 |
| Emergency admission | No | 14216 (99.0) | 141 (1.0) | <0.001 |
| Yes | 9352 (97.3) | 259 (2.7) |  |
| Missing category | 135 (100) | 0 (0) |  |
| Ambulance transport | No | 19771 (98.7) | 270 (1.3) | <0.001 |
| Yes | 3932 (96.8) | 130 (3.2) |  |
| Dementia | Absence | 23058 (98.3) | 390 (1.7) | 0.787 |
| Presence | 645 (98.5) | 10 (1.5) |  |
| Parkinson's disease | Absence | 23494 (98.4) | 391 (1.6) | 0.004 |
| Presence | 209 (95.9) | 9 (4.1) |  |
| Stroke | Absence | 21372 (98.5) | 330 (1.5) | <0.001 |
| Presence | 2331 (97.1) | 70 (2.9) |  |
| Visual impairment | Absence | 21024 (98.3) | 353 (1.7) | 0.779 |
| Presence | 2679 (98.3) | 47 (1.7) |  |
| Use of care insurance | No | 4443 (98.4) | 70 (1.6) | <0.001 |
| Yes | 3508 (97.0) | 109 (3.0) |  |
| Missing category | 15752 (98.6) | 221 (1.4) |  |
| Bedriddenness rank | J | 13746 (99.1) | 120 (0.9) | <0.001 |
| A | 4288 (97.4) | 115 (2.6) |  |
| B | 1377 (95.7) | 62 (4.3) |  |
| C | 3177 (96.9) | 103 (3.1) |  |
| Presence of cognitive function scores | No | 21239 (98.5) | 331 (1.5) | <0.001 |
| Yes | 1702 (96.1) | 69 (3.9) |  |
| Missing category | 762 (100) | 0 (0) |  |
| Inpatient ward | Internal medicine | 12869 (98.4) | 212 (1.6) | <0.001 |
| Department of Surgery | 9818 (98.5) | 154 (1.5) |  |
| Emergency Department | 1016 (96.8) | 34 (3.2) |  |
| Disturbance of consciousness | Absence | 21372 (98.6) | 313 (1.4) | <0.001 |
| Presence | 2327 (96.4) | 87 (3.6) |  |
| Missing category | 4 (100) | 0 (0) |  |
| Eating | Independent | 18573 (99.0) | 197 (1.0) | <0.001 |
| Requiring assistance | 4877 (96.2) | 195 (3.8) |  |
| Missing category | 253 (96.9) | 8 (3.1) |  |
| Transferring | Independent | 17201 (99.1) | 161 (0.9) | <0.001 |
| Requiring assistance | 6444 (96.5) | 237 (3.5) |  |
| Missing category | 58 (96.2) | 2 (3.3) |  |
| Dressing | Independent | 18617 (98.9) | 209 (1.1) | <0.001 |
| Requiring assistance | 4923 (96.4) | 186 (3.6) |  |
| Missing category | 163 (97.0) | 5 (3.0) |  |
| Moving and using the toilet | Independent | 17935 (99.0) | 182 (1.0) | <0.001 |
| Requiring assistance | 5595 (96.3) | 214 (3.7) |  |
| Missing category | 173 (97.7) | 4 (2.3) |  |
| Bathing | Independent | 17500 (99.0) | 170 (1.0) | <0.001 |
| Requiring assistance | 5402 (96.3) | 207 (3.7) |  |
| Missing category | 801 (97.2) | 23 (2.8) |  |
| Walking on level ground | Independent | 17578 (99.1) | 168 (0.9) | <0.001 |
| Requiring assistance | 5670 (96.2) | 222 (3.8) |  |
| Missing category | 455 (97.8) | 10 (2.2) |  |
| Stair climbing | Independent | 17076 (99.1) | 156 (0.9) | <0.001 |
| Requiring assistance | 5309 (96.3) | 204 (3.7) |  |
| Missing category | 1318 (97.1) | 40 (2.9) |  |
| Changing clothes | Independent | 17852 (99.0) | 183 (1.0) | <0.001 |
| Requiring assistance | 5722 (96.4) | 214 (3.6) |  |
| Missing category | 129 (97.7) | 3 (2.3) |  |
| Defecation management | Independent | 19122 (98.8) | 236 (1.2) | <0.001 |
| Requiring assistance | 4259 (96.4) | 159 (3.6) |  |
| Missing category | 322 (98.5) | 5 (1.5) |  |
| Urination management | Independent | 19090 (98.8) | 232 (1.2) | <0.001 |
| Requiring assistance | 4301 (96.4) | 161 (3.6) |  |
| Missing category | 312 (97.8) | 7 (2.2) |  |
| Good sleep condition | Yes | 12662 (98.6) | 180 (1.4) | 0.003 |
| No | 3268 (97.9) | 70 (2.1) |  |
| Missing category | 7773 (98.1) | 150 (1.9) |  |
| Use of sleeping pills | Absence | 11410 (98.6) | 163 (1.4) | 0.009 |
| Presence | 2417 (97.9) | 52 (2.1) |  |
| Missing category | 9876 (98.2) | 185 (1.8) |  |
| Medication management status | Myself | 8907 (98.9) | 103 (1.1) | <0.001 |
| Others | 1041 (96.4) | 39 (3.6) |  |
| Missing category | 13755 (98.2) | 258 (1.8) |  |
| History of falls within 1 year | Absence | 18448 (98.7) | 249 (1.3) | <0.001 |
| Presence | 2554 (96.2) | 100 (3.8) |  |
| Missing category | 2701 (98.1) | 51 (1.9) |  |
| Inability to stand without holding | Absence | 12403 (99.3) | 85 (0.7) | <0.001 |
| Presence | 9260 (97.0) | 290 (3.0) |  |
| Missing category | 2040 (98.8) | 25 (1.2) |  |
| Impaired judgment and comprehension | Absence | 18201 (98.6) | 254 (1.4) | <0.001 |
| Presence | 2682 (96.4) | 100 (3.6) |  |
| Missing category | 2820 (98.4) | 46 (1.6) |  |
| Toileting assistance | Absence | 15891 (98.9) | 181 (1.1) | <0.001 |
| Presence | 4528 (96.5) | 163 (3.5) |  |
| Missing category | 3284 (98.3) | 56 (1.7) |  |
| Use of portable toilet | Absence | 18102 (98.5) | 267 (1.5) | <0.001 |
| Presence | 1066 (95.5) | 50 (4.5) |  |
| Missing category | 4535 (98.2) | 83 (1.8) |  |

Note: Categorical variables are presented as number of patients and percentages, and continuous variables are presented as mean and standard error.

Abbreviation: BMI, body mass index

a Intergroup comparisons were made using t-test and chi-square test for continuous and categorical variables, respectively.

**Supplementary Table 8.** Multivariable Cox proportional hazards model (validation set, N=15,426)

| **Variable (reference group)** | **Category or Unit** | **HR** | **95%CI** | | **P-valuea** |
| --- | --- | --- | --- | --- | --- |
| Lower | Upper |
| Age | Years | 1.02 | 1.01 | 1.03 | 0.002 |
| Gender (Female) | Male | 1.52 | 1.17 | 1.97 | 0.002 |
| BMI (kg/m2) | 1 Kg/m2 | 0.96 | 0.93 | 0.99 | 0.020 |
| Stroke (Absence) | Presence | 1.20 | 0.87 | 1.66 | 0.258 |
| Inpatient ward (Internal medicine) | Department of Surgery | 0.98 | 0.75 | 1.28 | 0.016 |
|  | Emergency Department | 1.90 | 1.21 | 3.00 |  |
| Medication management status (Myself) | Others | 1.69 | 1.04 | 2.77 | 0.083 |
|  | Missing category | 1.34 | 0.97 | 1.86 |  |
| Use of care insurance (Not applicable) | Applicable | 0.96 | 0.64 | 1.45 | 0.492 |
|  | Missing category | 1.14 | 0.81 | 1.62 |  |
| History of falls within 1 year (Absence) | Presence | 1.51 | 1.11 | 2.06 | 0.028 |
|  | Missing category | 1.28 | 0.89 | 1.84 |  |
| Bedriddenness rank (Rank J) | Rank A | 1.87 | 1.34 | 2.62 | <0.001 |
|  | Rank B | 1.99 | 1.30 | 3.04 |  |
|  | Rank C | 1.24 | 0.84 | 1.84 |  |

Abbreviations: BMI, body mass index; HR, odds ratio; CI, confidence interval.

a P-value for Wald test.

**Supplementary Table 9.** Predictive performance of each model (validation set, N=15,426)

| Models | Subgroup | C-index (95%CI) of model  for falls within 28 days |
| --- | --- | --- |
| Integrated model by bedriddenness rank a | Total (N＝15,426) | 0.753 (0.723-0.783) |
| Rank J (N = 9,274) | 0.727 (0.662-0.790) |
| Rank A (N＝2,966) | 0.658 (0.592-0.724) |
| Rank B (N＝969) | 0.648 (0.557-0.739) |
| Rank C (N＝2,217) | 0.602 ( 0.548-0.656) |
| Unstratified model b | Total (N＝15,251) | 0.745 (0.714-0.775) |

Abbreviation: CI, confidence interval.

a Integrated model by bedriddenness rank is a model integrated after modelling stratified by bedriddenness rank.

b Unstratified model is a model for all analysis individuals (not stratified by bedriddenness rank).
